# Supplementary material for: Callous-unemotional Traits in Preschool Children With Attention Deficit/hyperactivity Disorder
Source: Research Square preprint supplement (doi:10.21203/rs.3.rs-109185/v1), 2020-11-24
Supplement: Supplementary file 2 [file ed05d1bc35393a252ad192f0.docx]

| **Table 1**  Comparisons of Age and Sexamong the ADHD, ASD and TDC Groups | | | | | |
| --- | --- | --- | --- | --- | --- |
|  | ADHD  (*n* =89) | ASD  (*n* =51) | TDC  (*n* =87) | *F****/****χ2* | *p* |
| Age (months, mean ± SD) | 56.88±7.96 | 55.16±11.40 | 55.16±7.29 | 0.10 | 0.906 |
| Sex(male/female) | 77/12 | 45/6 | 67/19 | 3.39 | 0.184 |

SD: standard deviation; ADHD: attention-deficit/hyperactivity disorder; ASD: autism spectrum disorder; TDC: typically developing child

| **Table 2**  Comparisons of CU traits among the ADHD, ASD and TDC groups (mean ± SD) | | | | | |
| --- | --- | --- | --- | --- | --- |
|  | | ADHD a  (*n* =89) | ASD b  (*n* =51) | TDC c  (*n* =85) | *F* | Posthoctest |
| Callousness | | 9.49±5.20 | 12.08±6.46 | 5.45±3.58 | 30.24*** | b>a>c |
| Uncaring | | 16.24±3.93 | 17.82±5.04 | 10.79±4.07 | 54.58*** | b>a>c |
| Unemotional | | 4.58±2.43 | 7.26±1.79 | 4.23±2.33 | 31.19*** | b>a=c |
| Total ICU score | | 30.21±9.35 | 37.16±10.19 | 20.39±7.40 | 59.87*** | b>a>c |

*** *P* < 0.001

CU: callous-unemotional; ADHD: attention-deficit/hyperactivity disorder; ASD: autism spectrum disorder; TDC: typically developing child; ICU: Inventory of Callous-Emotional Traits

| **Table 3**  Comparison of CU traits between the ADHD only, ADHD+ODD and TDC groups (mean ± SD) | | | | | |
| --- | --- | --- | --- | --- | --- |
| Subscales | ADHD only a  (*n* =55) | ADHD+ODD b  (*n* =34) | TDC c  (*n* =87) | *F* | Post hoc test | |
| Callousness | 8.67 ± 5.29 | 10.82 ± 4.83 | 5.45 ± 3.58 | 20.42*** | b > a > c | |
| Uncaring | 15.87 ± 4.03 | 16.82 ± 3.75 | 10.79 ± 4.07 | 40.60*** | a= b > c | |
| Unemotional | 4.83 ± 2.45 | 4.18 ± 2.39 | 4.23 ± 2.34 | 1.27 | ns | |
| TotalICU | 29.70 ± 10.4 | 32.04 ± 8.30 | 21.39 ± 7.40 | 30.12*** | a= b >c | |

*** *P* < 0.001

CU: callous-unemotional; ADHD: attention-deficit/hyperactivity disorder; ODD: oppositional defiant disorder; ADHD + ODD: ADHD and comorbid ODD; TDC: typically developing child; ICU: Inventory of Callous-Emotional Traits

| **Table 4**  Pearson’s Correlations Coefficients Between the ICU Subscalesand Behavioural Problems and Executive Function | | | | | | | | |
| --- | --- | --- | --- | --- | --- | --- | --- | --- |
| Subscales |  | | Callousness Uncaring Unemotional Total ICU | | | | | |
| SDQ | |  | | | | | | |
| Emotional symptoms | |  | | 0.25** |  | 0.24** | 0.21** | 0.29** |
| Conduct problems | | 0.33** | 0.42** | 0.06 | 0.38** |
| Hyperactivity | | 0.47** | 0.58** | 0.10 | 0.54** |
| Peer problems | | 0.52** | 0.50** | 0.45** | 0.61** |
| Total difficulties | | 0.59** | 0.65** | 0.30** | 0.68** |
| Prosocial behaviours | | -0.51** | -0.69** | -0.45* | -0.68** |
| BRIEF-P | |  |  |  |  |
| Inhibition | | 0.54** | 0.68** | 0.25** | 0.66** |
| Shift | | 0.41** | 0.41** | 0.32** | 0.49** |
| Emotional control | | 0.40** | 0.44** | 0.23** | 0.47** |
| Working memory | | 0.53** | 0.60** | 0.27** | 0.63** |
| Plan/organize | | 0.49** | 0.51** | 0.23** | 0.55** |
| ISC | | 0.53** | 0.64** | 0.26** | 0.64** |
| FI | | 0.45** | 0.47** | 0.30** | 0.53** |
| EMI | | 0.54** | 0.59** | 0.27** | 0.63** |
| GEC | | 0.56** | 0.64** | 0.30** | 0.67** |

* *P* < 0.05, ** *P* < 0.01

ICU: Inventory of Callous-Unemotional Traits;SDQ: Strengths and Difficulties Questionnaire; BRIEF-P: BehaviorRatingScale of Executive Function-Preschool Version; ISC: Inhibition Self-control Index; FI: Flexibility Index; EMI: Emergent Metacognition Index; GER: Global Executive Composite.

| **Table 5**  Pearson’s Correlations Between CU Traits (subscale scoresandtotal CU scores) and ADHD Symptoms(subscales scores and total scores) | | | | |
| --- | --- | --- | --- | --- |
| Subscale | Callousness | Uncaring | Unemotional | Total ICU |
| Inattention | 0.40** | 0.54** | -0.05 | 0.47** |
| Hyperactivity | 0.32** | 0.54** | -0.09 | 0.42** |
| Oppositional defiant | 0.31** | 0.44** | -0.12 | 0.34** |
| Total ADHD symptoms | 0.39** | 0.58** | -0.07 | 0.48** |

** *P* < 0.01

ICU: Inventory of Callous-Unemotional Traits; ADHD: attention-deficit/hyperactivity disorder

| **Table 6**  Linear Regression AnalysisfortheEffect of CU Traits on the Symptoms of ADHD | | | | |
| --- | --- | --- | --- | --- |
| Variable | *β* | *R2* | *t* | *p* |
| Attention | 0.55 | 0.20 | 8.704 | <0.001 |
| Hyperactivity | 0.39 | 0.15 | 5.224 | <0.001 |
| Oppositional defiant | 0.32 | 0.11 | 4.264 | <0.001 |
| Total ADHD symptoms | 0.49 | 0.24 | 7.023 | <0.001 |

*β* = standardized regression coefficient; *R2*= determination coefficient;CU: callous-unemotional traits; ADHD: attention-deficit/hyperactivity disorder

| **Table 7**  Identification of potential covariates | | | | |
| --- | --- | --- | --- | --- |
| Variable | TotalICUtotalscore | | TotalADHD symptoms | |
| *β* | *p* | *β* | *p* |
| Age | 0.06 | 0.47 | -0.05 | 0.54 |
| Sex | -0.16 | 0.04 | -0.22 | 0.00 |
| CPs | 0.50 | 0.00 | 0.34 | 0.00 |
| OD | 0.34 | 0.00 | 0.65 | 0.00 |

*β* = standardized regression coefficient;ICU: Inventory of Callous-Unemotional Traits; ADHD: attention-deficit/hyperactivity disorder; CPs: conduct problems; OD: oppositional defiant

| **Table 8**  Incremental validity of the ICU Scale for predicting ADHD symptoms and diagnosis of ADHD | | | | |
| --- | --- | --- | --- | --- |
|  | ADHD symptoms | | ADHD diagnosis | |
|  | *β* | *p* | *OR* (95% CI) | *p* |
| Model 1 |  |  |  |  |
| Sex | -0.16 | 0.005 | 0.74 (0.29 ~ 1.87) | 0.52 |
| OD | 0.64 | 0.00 | 1.32 (1.19 ~ 1.47) | 0.00 |
| *R12* | 0.45 |  | 0.22 |  |
| Model 2 |  |  |  |  |
| Sex | -0.13 | 0.02 | 0.89 (0.32 ~ 2.52) | 0.83 |
| OD | 0.55 | 0.00 | 1.27 (1.13 ~ 1.42) | 0.00 |
| CU | 0.27 | 0.00 | 1.13 (1.07 ~ 1.18) | 0.00 |
| *R22* | 0.51 |  | 0.35 |  |
| *ΔR2* | 0.06 |  | 0.13 |  |

*β* = standardized regression coefficient; CI= confidence interval; OR = odds ratio; OD: oppositional defiant; CU: Callous-unemotional; ADHD: attention-deficit/hyperactivity disorder

The standardized regression coefficients (*β*) were calculated by converting all predictors and outcomes to z-scores before the analysis.

Model 1 predictive variable: sex, OD

Model 2 predictive variable: sex, OD, CU
